# Supplementary material for: Hydrogel Film-Immobilized Lactobacillus brevis RK03 for γ-Aminobutyric Acid Production
Source: PubMed Central journal article supplement (PMC5713293; doi:10.3390/ijms18112324), 2017-11-03
Supplement: ijms-18-02324-s001.pdf [file ijms-18-02324-s001.pdf]

**Table S1.** Growth of *Lactobacillus brevis* RK03 attached onto hydrogels in MRS medium.

|                        | <b>Incubation Time (h)</b> |                 |                 |                 |                 |                 |                 |
|------------------------|----------------------------|-----------------|-----------------|-----------------|-----------------|-----------------|-----------------|
|                        | <b>12 h</b>                | <b>24 h</b>     | <b>36 h</b>     | <b>48 h</b>     | <b>60 h</b>     | <b>72 h</b>     | <b>84 h</b>     |
| <b>MRS Broth pH</b>    | 4.61                       | 4.73            | 4.89            | 7.42            | 7.33            | 7.19            | 7.08            |
| <b>Absorption Rate</b> | $0.95 \pm 0.14$            | $0.98 \pm 0.09$ | $1.01 \pm 0.12$ | $1.05 \pm 0.17$ | $1.14 \pm 0.11$ | $1.03 \pm 0.15$ | $1.01 \pm 0.19$ |

Absorption rate:  $\text{Hydrogel}_{\text{cell count (log CFU/mL)}} / \text{Planktonic Control}_{\text{cell count (log CFU/mL)}}$ .
